# Supplementary material for: The Spillover Effects of Monitoring: A Field Experiment
Source: Atypon-hosted journal article supplement (doi:10.1287/mnsc.2014.2089), 2015-03-13
Supplement: mnsc.2014.2089-sm-appendix.pdf [file mnsc.2014.2089-sm-appendix.pdf]

## **Online Appendix**

**Material translated from German. Original material available on request.**

### **Field Experiment:**

- **Recruitment sheet**
- **E-Mail contact**
- **Script for verbal instructions**
- **Reminder sheet**
- **Euro coin catalog**
- **Identification sheets**

### **Lab Experiment:**

- **Instructions**
- **Screenshots**

## Support for research project at the faculty of economics and management needed!

If you are interested in earning cash,

please contact [nebenverdienst@ovgu.de](mailto:nebenverdienst@ovgu.de)

- **Who?** – all students
- **When?** – flexible work hours, approx. 2 - 3 hours of work time
- **Where?** – at home (collection and return of work material in G22)
- **Why?** – earn approx. **20 Euro**
- **How?** – Contact us!

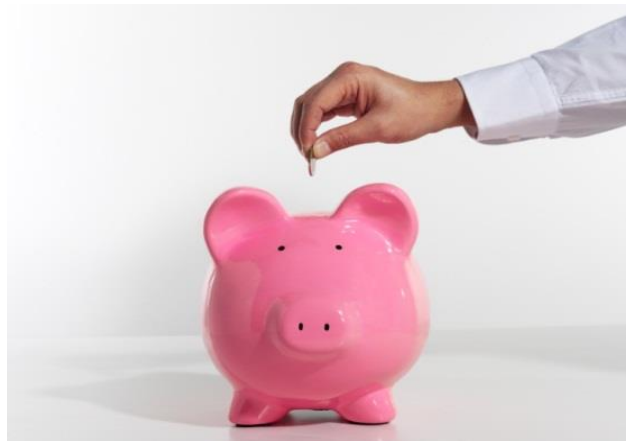

## **E-Mail Correspondence (translated to English)**

### **1. Response to e-mail by interested student**

#### **a) Offering date to interested students**

Hello,

Thank you very much for your interest in supporting our research project.

The task consists of identifying euro coins that we have collected in different European countries. We ask you to indicate the denomination of the coins and the corresponding country where they were printed. The pay is 20 euro. We do not know exactly how long the task will take, but we think that it should take 3 hours at the very maximum. We will pay you in cash once the task is completed.

You can do this task at home. However, you will need to collect and return the work material to the university (building XX, room XXX). To do so, I suggest two dates:

- Collection Wednesday XX.XX.20XX between 10:00 a.m. und 12:30 p.m. and return Thursday XX.XX.20XX between 3:30 p.m. and 6:00p.m.

- Collection Monday XX.XX.20XX between 10:00 a.m. und 12:30 p.m. and return Tuesday XX.XX.20XX between 3:30 p.m. and 6:00p.m.

Please tell us on which date and time you will pick up the work material, and keep in mind that this will take about 10 minutes.

Kind regards,

XXX XXX

#### **a) Response to interested students who had participated in a previous related lab experiment:**

Hello,

Thank you very much for your interest in supporting our research project.

Unfortunately, we cannot offer you a date to participate in this project.

Kind regards,

XXX XXX

**b) Response to interested student when there were no remaining free dates**

Hallo,

Thank you very much for your interest in supporting our research project.

Unfortunately, we do not have any dates free at the moment. We will inform you about future dates per mail.

Kind regards,

XXX XXX

**c) Reminder for participants who do not choose a date**

Hello,

Unfortunately, you have not yet informed us if you are interested in participating in our research project. Please inform us as soon as possible whether you are interested in participating and at which date you would like to collect the work material. If we do not hear from you in the coming days, we will assume that you are not interested in participating.

Thank you in advance for your response and kind regards,

XXX XXX

**d) Reminder for participants who had chosen a date**

Hello,

I would like to remind you that you have an appointment to collect the work material for the research project at the university (buiding XX, room XX) for tomorrow.

Kind regards,

XXX XXX

## **2) Feedback from the Monitoring treatments**

### **a) Lax monitoring – less than 10 mistakes**

Hello,

We have randomly checked one out of the four boxes and have not discovered more than 10 mistakes. You can collect the remaining payment on Mondays or Wednesdays between 10:00 a.m. and 12:30 p.m. and Tuesdays and Thursdays between 3:30 p.m. and 6:00 p.m. in building XX room XX. Please keep in mind that the university is closed in the time between 21.12. and 7.1. and that you have to collect the money before 25.01. Payment after this date is not possible.

Kind regards,

XXX XX

### **b) Lax monitoring – More than 10 mistakes**

Hello,

We have randomly checked one out of the four boxes and have discovered more than 10 mistakes. Therefore we cannot pay the remaining payment of 1 € to you.

Kind regards,

XXX XXX

### **c) Strict monitoring – Less than 2 mistakes**

Hello,

We have randomly checked one out of the four boxes and have not discovered more than 2 mistakes. You can collect the remaining payment on Mondays or Wednesdays between 10:00 a.m. and 12:30 p.m. and Tuesdays and Thursdays between 3:30 p.m. and 6:00 p.m. in building XX room XX. Please keep in mind that the university is closed in the time between 21.12. and 7.1. and that you have to collect the money before 25.01. Payment after this date is not possible.

Kind regards,

XXX XXX

**d) Strict monitoring – More than 2 mistakes**

Hello,

We have randomly checked one out of the four boxes and have discovered more than 2 mistakes.  
Therefore we cannot pay the remaining payment of 15 € to you.

Kind regards,

XXX XXX

## **Script**

### **Sequence and contents of the verbal instructions**

Thank you for supporting this research project on the euro currency.

All necessary work material is provided in the bags. (*Point to bags.*) Each bag contains 4 boxes with Euro coins, 4 identification sheets and a catalog that shows the most common Euro coins in alphabetical order. (*Show the work material.*)

We collected the coins in different European countries. The lid of a box indicates the country coins were collected in. (*Open one box and show the lid.*) Your task consists in identifying the coins with the help of the catalogue. The catalogue illustrates the most common Euro coins in alphabetical order of their country of origin. (*Show coin catalogue.*) Commemorative coins and coins from microstates such as the Vatican or Monaco are not included in the catalogue. Should you find one of these coins in your box, please identify them as “not in the catalogue”.

Please identify all coins in the box with the help of the catalogue. For each coin please identify the value and the country the coins was printed in on the identification sheet. (*Show identification sheet.*) Countries on the identification sheet are listed in alphabetical order, just as in the catalogue. Please identify all coins that you cannot find in the catalogue in the last row of the identification sheet as “not in the catalogue”.

Please, always use a new identification sheet for each box and note the country that coins were collected in, as indicated on the lid, on the sheet before you start identifying the coins. Then, please indicate on the identification sheet the value and the country the coin was printed in and do this for every single coin in the box. (*Explain the task using an example. First, take a coin out of an opened box. Then, search through the catalogue until you reach the picture of the selected coin. Show the student in which position of the identification sheet she should put the mark to identify this coin.*)

Please identify boxes one at a time. After identifying all coins from one box, please put all coins back into that box and close it. (*Put back the coin that was used as an example before and close the box.*) Please only start working on the next box once all coins from the previous box have been returned to the box und use a new identification sheet for each box.

Tomorrow afternoon you will bring back all the work material to XXX.

### **No monitoring**

You will directly receive 20 Euro in cash. Bringing back the material will only take about 1 minute of your time.

### **Lax monitoring**

You will directly receive 19 Euro in cash. Bringing back the material will only take about 1 minute of your time. I will then randomly pick one out of the four boxes that you have

identified and check it myself. If you made 10 or fewer mistakes in identifying the coins, you can collect the remaining 1 Euro from XXX. If you made more than 10 mistakes, you will not receive the remaining 1 Euro. We will let you know via e-mail whether you will receive the remaining payment or not.

### **Strict monitoring**

You will directly receive 5 Euro in cash. Bringing back the material will only take about 1 minute of your time. I will then randomly pick one out of the four boxes that you have identified and check it myself. If you made 2 or fewer mistakes in identifying the coins, you can collect the remaining 15 Euro from XXX. If you made more than 2 mistakes, you will not receive the remaining 15 Euro. We will let you know via e-mail whether you will receive the remaining payment or not.

Do you have any questions regarding the task or the payment regulations? (*Answer all questions, whenever possible with examples and real coins.*)

I will give you a short summary. (*Read the summary of the task and explain the payment regulations a second time.*)

Now, I would like to agree on the exact time at which you will bring back the work material tomorrow. At which time tomorrow between 3:30 p.m. and 6:00 p.m. will you bring back the work material? (*Give the participant time to check his calendar and then note the exact time of the appointment down to the minute on the summary sheet. Hand the summary sheet to the participant.*)

Now you can choose one of these bags.

### ***When the participants bring back the coins:***

- *Note the time they enter the office.*
- *Pay them and let them sign the receipt.*
- *Ask how much time they needed to identify all coins.*
- *Ask them at which faculty they study.*

**For each box please follow this sequence:**

- Identify all coins contained in the box and note the country coins were printed in and the value of the coins in the identification table.
- Put all coins back into the box and close the box.
- Afterwards, please continue with the next box. Please remember to use a **new identification** table for each box.

After identifying all boxes, please return all the work material to room XX (building XX) at the appointed time.

Please return the work material at the following date:

*Handwritten note appointing the date and precise time at which coins should be returned.*

## BELGIUM

|                                                                                                      |                                                                                                      |                                                                                                      |
|------------------------------------------------------------------------------------------------------|------------------------------------------------------------------------------------------------------|------------------------------------------------------------------------------------------------------|
| <b>2 euro</b><br>   | <b>1 euro</b><br>   |                                                                                                      |
| <b>50 cents</b><br> | <b>20 cents</b><br> | <b>10 cents</b><br> |
| <b>5 cents</b><br> | <b>2 cents</b><br> | <b>1 cent</b><br>  |

## GERMANY

|                                                                                                        |                                                                                                        |                                                                                                        |
|--------------------------------------------------------------------------------------------------------|--------------------------------------------------------------------------------------------------------|--------------------------------------------------------------------------------------------------------|
| <b>2 euro</b><br>   | <b>1 euro</b><br>   |                                                                                                        |
| <b>50 cents</b><br> | <b>20 cents</b><br> | <b>10 cents</b><br> |
| <b>5 cents</b><br> | <b>2 cents</b><br> | <b>1 cent</b><br>  |

## ESTONIA

|                                                                                                      |                                                                                                      |                                                                                                      |
|------------------------------------------------------------------------------------------------------|------------------------------------------------------------------------------------------------------|------------------------------------------------------------------------------------------------------|
| <b>2 euro</b><br>   | <b>1 euro</b><br>   |                                                                                                      |
| <b>50 cents</b><br> | <b>20 cents</b><br> | <b>10 cents</b><br> |
| <b>5 cents</b><br> | <b>2 cents</b><br> | <b>1 cent</b><br>  |

## IRELAND

|                                                                                                        |                                                                                                        |                                                                                                        |
|--------------------------------------------------------------------------------------------------------|--------------------------------------------------------------------------------------------------------|--------------------------------------------------------------------------------------------------------|
| <b>2 euro</b><br>   | <b>1 euro</b><br>   |                                                                                                        |
| <b>50 cents</b><br> | <b>20 cents</b><br> | <b>10 cents</b><br> |
| <b>5 cents</b><br> | <b>2 cents</b><br> | <b>1 cent</b><br>  |

## GREECE

|                                                                                                      |                                                                                                      |                                                                                                      |
|------------------------------------------------------------------------------------------------------|------------------------------------------------------------------------------------------------------|------------------------------------------------------------------------------------------------------|
| <b>2 euro</b><br>   | <b>1 euro</b><br>   |                                                                                                      |
| <b>50 cents</b><br> | <b>20 cents</b><br> | <b>10 cents</b><br> |
| <b>5 cents</b><br> | <b>2 cents</b><br> | <b>1 cent</b><br>  |

## SPAIN

|                                                                                                        |                                                                                                        |                                                                                                        |
|--------------------------------------------------------------------------------------------------------|--------------------------------------------------------------------------------------------------------|--------------------------------------------------------------------------------------------------------|
| <b>2 euro</b><br>   | <b>1 euro</b><br>   |                                                                                                        |
| <b>50 cents</b><br> | <b>20 cents</b><br> | <b>10 cents</b><br> |
| <b>5 cents</b><br> | <b>2 cents</b><br> | <b>1 cent</b><br>  |

**FRANCE**

|                                                                                                      |                                                                                                      |                                                                                                      |
|------------------------------------------------------------------------------------------------------|------------------------------------------------------------------------------------------------------|------------------------------------------------------------------------------------------------------|
| <b>2 euro</b><br>   | <b>1 euro</b><br>   |                                                                                                      |
| <b>50 cents</b><br> | <b>20 cents</b><br> | <b>10 cents</b><br> |
| <b>5 cents</b><br> | <b>2 cents</b><br> | <b>1 cent</b><br>  |

**ITALY**

|                                                                                                        |                                                                                                        |                                                                                                        |
|--------------------------------------------------------------------------------------------------------|--------------------------------------------------------------------------------------------------------|--------------------------------------------------------------------------------------------------------|
| <b>2 euro</b><br>   | <b>1 euro</b><br>   |                                                                                                        |
| <b>50 cents</b><br> | <b>20 cents</b><br> | <b>10 cents</b><br> |
| <b>5 cents</b><br> | <b>2 cents</b><br> | <b>1 cent</b><br>  |

## CYPRUS

|                                                                                                      |                                                                                                      |                                                                                                      |
|------------------------------------------------------------------------------------------------------|------------------------------------------------------------------------------------------------------|------------------------------------------------------------------------------------------------------|
| <b>2 euro</b><br>   | <b>1 euro</b><br>   |                                                                                                      |
| <b>50 cents</b><br> | <b>20 cents</b><br> | <b>10 cents</b><br> |
| <b>5 cents</b><br> | <b>2 cents</b><br> | <b>1 cent</b><br>  |

## LUXEMBOURG

|                                                                                                        |                                                                                                        |                                                                                                        |
|--------------------------------------------------------------------------------------------------------|--------------------------------------------------------------------------------------------------------|--------------------------------------------------------------------------------------------------------|
| <b>2 euro</b><br>   | <b>1 euro</b><br>   |                                                                                                        |
| <b>50 cents</b><br> | <b>20 cents</b><br> | <b>10 cents</b><br> |
| <b>5 cents</b><br> | <b>2 cents</b><br> | <b>1 cent</b><br>  |

## MALTA

|                                                                                                      |                                                                                                      |                                                                                                      |
|------------------------------------------------------------------------------------------------------|------------------------------------------------------------------------------------------------------|------------------------------------------------------------------------------------------------------|
| <b>2 euro</b><br>   | <b>1 euro</b><br>   |                                                                                                      |
| <b>50 cents</b><br> | <b>20 cents</b><br> | <b>10 cents</b><br> |
| <b>5 cents</b><br> | <b>2 cents</b><br> | <b>1 cent</b><br>  |

## THE NETHERLANDS

|                                                                                                        |                                                                                                        |                                                                                                        |
|--------------------------------------------------------------------------------------------------------|--------------------------------------------------------------------------------------------------------|--------------------------------------------------------------------------------------------------------|
| <b>2 euro</b><br>   | <b>1 euro</b><br>   |                                                                                                        |
| <b>50 cents</b><br> | <b>20 cents</b><br> | <b>10 cents</b><br> |
| <b>5 cents</b><br> | <b>2 cents</b><br> | <b>1 cent</b><br>  |

## AUSTRIA

|                                                                                                      |                                                                                                      |                                                                                                      |
|------------------------------------------------------------------------------------------------------|------------------------------------------------------------------------------------------------------|------------------------------------------------------------------------------------------------------|
| <b>2 euro</b><br>   | <b>1 euro</b><br>   |                                                                                                      |
| <b>50 cents</b><br> | <b>20 cents</b><br> | <b>10 cents</b><br> |
| <b>5 cents</b><br> | <b>2 cents</b><br> | <b>1 cent</b><br>  |

## PORTUGAL

|                                                                                                        |                                                                                                        |                                                                                                        |
|--------------------------------------------------------------------------------------------------------|--------------------------------------------------------------------------------------------------------|--------------------------------------------------------------------------------------------------------|
| <b>2 euro</b><br>   | <b>1 euro</b><br>   |                                                                                                        |
| <b>50 cents</b><br> | <b>20 cents</b><br> | <b>10 cents</b><br> |
| <b>5 cents</b><br> | <b>2 cents</b><br> | <b>1 cent</b><br>  |

## SLOVENIA

|                                                                                                      |                                                                                                      |                                                                                                      |
|------------------------------------------------------------------------------------------------------|------------------------------------------------------------------------------------------------------|------------------------------------------------------------------------------------------------------|
| <b>2 euro</b><br>   | <b>1 euro</b><br>   |                                                                                                      |
| <b>50 cents</b><br> | <b>20 cents</b><br> | <b>10 cents</b><br> |
| <b>5 cents</b><br> | <b>2 cents</b><br> | <b>1 cent</b><br>  |

## SLOVAKIA

|                                                                                                        |                                                                                                        |                                                                                                        |
|--------------------------------------------------------------------------------------------------------|--------------------------------------------------------------------------------------------------------|--------------------------------------------------------------------------------------------------------|
| <b>2 euro</b><br>   | <b>1 euro</b><br>   |                                                                                                        |
| <b>50 cents</b><br> | <b>20 cents</b><br> | <b>10 cents</b><br> |
| <b>5 cents</b><br> | <b>2 cents</b><br> | <b>1 cent</b><br>  |

**FINLAND**

|                                                                                                      |                                                                                                      |                                                                                                      |
|------------------------------------------------------------------------------------------------------|------------------------------------------------------------------------------------------------------|------------------------------------------------------------------------------------------------------|
| <b>2 euro</b><br>   | <b>1 euro</b><br>   |                                                                                                      |
| <b>50 cents</b><br> | <b>20 cents</b><br> | <b>10 cents</b><br> |
| <b>5 cents</b><br> | <b>2 cents</b><br> | <b>1 cent</b><br>  |

**MONACO**

|                                                                                                        |                                                                                                        |                                                                                                        |
|--------------------------------------------------------------------------------------------------------|--------------------------------------------------------------------------------------------------------|--------------------------------------------------------------------------------------------------------|
| <b>2 euro</b><br>   | <b>1 euro</b><br>   |                                                                                                        |
| <b>50 cents</b><br> | <b>20 cents</b><br> | <b>10 cents</b><br> |
| <b>5 cents</b><br> | <b>2 cents</b><br> | <b>1 cent</b><br>  |

## SAN MARINO

|                                                                                                      |                                                                                                      |                                                                                                      |
|------------------------------------------------------------------------------------------------------|------------------------------------------------------------------------------------------------------|------------------------------------------------------------------------------------------------------|
| <b>2 euro</b><br>   | <b>1 euro</b><br>   |                                                                                                      |
| <b>50 cents</b><br> | <b>20 cents</b><br> | <b>10 cents</b><br> |
| <b>5 cent</b><br>  | <b>2 cents</b><br> | <b>1 cent</b><br>  |

## VATICAN CITY

|                                                                                                        |                                                                                                        |                                                                                                        |
|--------------------------------------------------------------------------------------------------------|--------------------------------------------------------------------------------------------------------|--------------------------------------------------------------------------------------------------------|
| <b>2 euro</b><br>   | <b>1 euro</b><br>   |                                                                                                        |
| <b>50 cents</b><br> | <b>20 cents</b><br> | <b>10 cents</b><br> |
| <b>5 cents</b><br> | <b>2 cents</b><br> | <b>1 cent</b><br>  |

## BELGIUM

|                                                                                                      |                                                                                                      |                                                                                                      |
|------------------------------------------------------------------------------------------------------|------------------------------------------------------------------------------------------------------|------------------------------------------------------------------------------------------------------|
| <b>2 euro</b><br>   | <b>1 euro</b><br>   |                                                                                                      |
| <b>50 cents</b><br> | <b>20 cents</b><br> | <b>10 cents</b><br> |
| <b>5 cents</b><br> | <b>2 cents</b><br> | <b>1 cent</b><br>  |

## GERMANY

|                                                                                                        |                                                                                                        |                                                                                                        |
|--------------------------------------------------------------------------------------------------------|--------------------------------------------------------------------------------------------------------|--------------------------------------------------------------------------------------------------------|
| <b>2 euro</b><br>   | <b>1 euro</b><br>   |                                                                                                        |
| <b>50 cents</b><br> | <b>20 cents</b><br> | <b>10 cents</b><br> |
| <b>5 cents</b><br> | <b>2 cents</b><br> | <b>1 cent</b><br>  |

## ESTONIA

|                                                                                                      |                                                                                                      |                                                                                                      |
|------------------------------------------------------------------------------------------------------|------------------------------------------------------------------------------------------------------|------------------------------------------------------------------------------------------------------|
| <b>2 euro</b><br>   | <b>1 euro</b><br>   |                                                                                                      |
| <b>50 cents</b><br> | <b>20 cents</b><br> | <b>10 cents</b><br> |
| <b>5 cents</b><br> | <b>2 cents</b><br> | <b>1 cent</b><br>  |

## IRELAND

|                                                                                                        |                                                                                                        |                                                                                                        |
|--------------------------------------------------------------------------------------------------------|--------------------------------------------------------------------------------------------------------|--------------------------------------------------------------------------------------------------------|
| <b>2 euro</b><br>   | <b>1 euro</b><br>   |                                                                                                        |
| <b>50 cents</b><br> | <b>20 cents</b><br> | <b>10 cents</b><br> |
| <b>5 cents</b><br> | <b>2 cents</b><br> | <b>1 cent</b><br>  |

## GREECE

|                                                                                                      |                                                                                                      |                                                                                                      |
|------------------------------------------------------------------------------------------------------|------------------------------------------------------------------------------------------------------|------------------------------------------------------------------------------------------------------|
| <b>2 euro</b><br>   | <b>1 euro</b><br>   |                                                                                                      |
| <b>50 cents</b><br> | <b>20 cents</b><br> | <b>10 cents</b><br> |
| <b>5 cents</b><br> | <b>2 cents</b><br> | <b>1 cent</b><br>  |

## SPAIN

|                                                                                                        |                                                                                                        |                                                                                                        |
|--------------------------------------------------------------------------------------------------------|--------------------------------------------------------------------------------------------------------|--------------------------------------------------------------------------------------------------------|
| <b>2 euro</b><br>   | <b>1 euro</b><br>   |                                                                                                        |
| <b>50 cents</b><br> | <b>20 cents</b><br> | <b>10 cents</b><br> |
| <b>5 cents</b><br> | <b>2 cents</b><br> | <b>1 cent</b><br>  |

**FRANCE**

|                                                                                                      |                                                                                                      |                                                                                                      |
|------------------------------------------------------------------------------------------------------|------------------------------------------------------------------------------------------------------|------------------------------------------------------------------------------------------------------|
| <b>2 euro</b><br>   | <b>1 euro</b><br>   |                                                                                                      |
| <b>50 cents</b><br> | <b>20 cents</b><br> | <b>10 cents</b><br> |
| <b>5 cents</b><br> | <b>2 cents</b><br> | <b>1 cent</b><br>  |

**ITALY**

|                                                                                                        |                                                                                                        |                                                                                                        |
|--------------------------------------------------------------------------------------------------------|--------------------------------------------------------------------------------------------------------|--------------------------------------------------------------------------------------------------------|
| <b>2 euro</b><br>   | <b>1 euro</b><br>   |                                                                                                        |
| <b>50 cents</b><br> | <b>20 cents</b><br> | <b>10 cents</b><br> |
| <b>5 cents</b><br> | <b>2 cents</b><br> | <b>1 cent</b><br>  |

## CYPRUS

|                                                                                                      |                                                                                                      |                                                                                                      |
|------------------------------------------------------------------------------------------------------|------------------------------------------------------------------------------------------------------|------------------------------------------------------------------------------------------------------|
| <b>2 euro</b><br>   | <b>1 euro</b><br>   |                                                                                                      |
| <b>50 cents</b><br> | <b>20 cents</b><br> | <b>10 cents</b><br> |
| <b>5 cents</b><br> | <b>2 cents</b><br> | <b>1 cent</b><br>  |

## LUXEMBOURG

|                                                                                                        |                                                                                                        |                                                                                                        |
|--------------------------------------------------------------------------------------------------------|--------------------------------------------------------------------------------------------------------|--------------------------------------------------------------------------------------------------------|
| <b>2 euro</b><br>   | <b>1 euro</b><br>   |                                                                                                        |
| <b>50 cents</b><br> | <b>20 cents</b><br> | <b>10 cents</b><br> |
| <b>5 cents</b><br> | <b>2 cents</b><br> | <b>1 cent</b><br>  |

## MALTA

|                                                                                                      |                                                                                                      |                                                                                                      |
|------------------------------------------------------------------------------------------------------|------------------------------------------------------------------------------------------------------|------------------------------------------------------------------------------------------------------|
| <b>2 euro</b><br>   | <b>1 euro</b><br>   |                                                                                                      |
| <b>50 cents</b><br> | <b>20 cents</b><br> | <b>10 cents</b><br> |
| <b>5 cents</b><br> | <b>2 cents</b><br> | <b>1 cent</b><br>  |

## THE NETHERLANDS

|                                                                                                        |                                                                                                        |                                                                                                        |
|--------------------------------------------------------------------------------------------------------|--------------------------------------------------------------------------------------------------------|--------------------------------------------------------------------------------------------------------|
| <b>2 euro</b><br>   | <b>1 euro</b><br>   |                                                                                                        |
| <b>50 cents</b><br> | <b>20 cents</b><br> | <b>10 cents</b><br> |
| <b>5 cents</b><br> | <b>2 cents</b><br> | <b>1 cent</b><br>  |

## AUSTRIA

|                                                                                                      |                                                                                                      |                                                                                                      |
|------------------------------------------------------------------------------------------------------|------------------------------------------------------------------------------------------------------|------------------------------------------------------------------------------------------------------|
| <b>2 euro</b><br>   | <b>1 euro</b><br>   |                                                                                                      |
| <b>50 cents</b><br> | <b>20 cents</b><br> | <b>10 cents</b><br> |
| <b>5 cents</b><br> | <b>2 cents</b><br> | <b>1 cent</b><br>  |

## PORTUGAL

|                                                                                                        |                                                                                                        |                                                                                                        |
|--------------------------------------------------------------------------------------------------------|--------------------------------------------------------------------------------------------------------|--------------------------------------------------------------------------------------------------------|
| <b>2 euro</b><br>   | <b>1 euro</b><br>   |                                                                                                        |
| <b>50 cents</b><br> | <b>20 cents</b><br> | <b>10 cents</b><br> |
| <b>5 cents</b><br> | <b>2 cents</b><br> | <b>1 cent</b><br>  |

## SLOVENIA

|                                                                                                      |                                                                                                      |                                                                                                      |
|------------------------------------------------------------------------------------------------------|------------------------------------------------------------------------------------------------------|------------------------------------------------------------------------------------------------------|
| <b>2 euro</b><br>   | <b>1 euro</b><br>   |                                                                                                      |
| <b>50 cents</b><br> | <b>20 cents</b><br> | <b>10 cents</b><br> |
| <b>5 cents</b><br> | <b>2 cents</b><br> | <b>1 cent</b><br>  |

## SLOVAKIA

|                                                                                                        |                                                                                                        |                                                                                                        |
|--------------------------------------------------------------------------------------------------------|--------------------------------------------------------------------------------------------------------|--------------------------------------------------------------------------------------------------------|
| <b>2 euro</b><br>   | <b>1 euro</b><br>   |                                                                                                        |
| <b>50 cents</b><br> | <b>20 cents</b><br> | <b>10 cents</b><br> |
| <b>5 cents</b><br> | <b>2 cents</b><br> | <b>1 cent</b><br>  |

**FINLAND**

|                                                                                                      |                                                                                                      |                                                                                                      |
|------------------------------------------------------------------------------------------------------|------------------------------------------------------------------------------------------------------|------------------------------------------------------------------------------------------------------|
| <b>2 euro</b><br>   | <b>1 euro</b><br>   |                                                                                                      |
| <b>50 cents</b><br> | <b>20 cents</b><br> | <b>10 cents</b><br> |
| <b>5 cents</b><br> | <b>2 cents</b><br> | <b>1 cent</b><br>  |

**MONACO**

|                                                                                                        |                                                                                                        |                                                                                                        |
|--------------------------------------------------------------------------------------------------------|--------------------------------------------------------------------------------------------------------|--------------------------------------------------------------------------------------------------------|
| <b>2 euro</b><br>   | <b>1 euro</b><br>   |                                                                                                        |
| <b>50 cents</b><br> | <b>20 cents</b><br> | <b>10 cents</b><br> |
| <b>5 cents</b><br> | <b>2 cents</b><br> | <b>1 cent</b><br>  |

## SAN MARINO

|                                                                                                      |                                                                                                      |                                                                                                      |
|------------------------------------------------------------------------------------------------------|------------------------------------------------------------------------------------------------------|------------------------------------------------------------------------------------------------------|
| <b>2 euro</b><br>   | <b>1 euro</b><br>   |                                                                                                      |
| <b>50 cents</b><br> | <b>20 cents</b><br> | <b>10 cents</b><br> |
| <b>5 cent</b><br>  | <b>2 cents</b><br> | <b>1 cent</b><br>  |

## VATICAN CITY

|                                                                                                        |                                                                                                        |                                                                                                        |
|--------------------------------------------------------------------------------------------------------|--------------------------------------------------------------------------------------------------------|--------------------------------------------------------------------------------------------------------|
| <b>2 euro</b><br>   | <b>1 euro</b><br>   |                                                                                                        |
| <b>50 cents</b><br> | <b>20 cents</b><br> | <b>10 cents</b><br> |
| <b>5 cents</b><br> | <b>2 cents</b><br> | <b>1 cent</b><br>  |

## Instructions

Thank you for participating in this economic experiment. All information from this experiment will of course remain **confidential and anonymous**. Please read these instructions carefully. If you have any questions regarding these instructions, please raise your hand. We will answer all questions **at your seat**. Please only select the “**continue**” button, if **you are sure** that you have **fully understood** the instructions and that you do not have any further questions.

### Your task

Your task consists of **identifying euro coins with the help of a euro coin catalog** that is provided at your seat. On your computer screen you will consecutively see 204 euro coins. These coins correspond to a random sample of different coins that were collected in **Austria**. For each coin, please indicate according to the catalog:

- the **denomination** of the coin (there are 8 types: 1 Cent, 2 Cent, 5 Cent...)
- the **country the coin was printed in**.

Note that the catalog only contains the most common euro coins. If you cannot find a coin in the catalog, please report it as “not in the catalog”. Also note that the catalog displays coins from one specific printing year. Coins may slightly differ between printing years; nevertheless, such coins are to be categorized as coming from the same country.

When you are done with the task of identifying all 204 euro coins, we ask you to fill in the **questionnaire** provided at your desk. After filling in the questionnaire, the experiment is completed. Please raise your hand to signal that you are done. We will then individually pay you. **Please make sure not to disturb the other participants in the experiment.**

### **Your payment**

All participants receive a **show-up fee of 2.50 euro**.

**Additionally**, you receive **10 euro** for performing the task of **identifying euro coins**. [T1]

**Additionally**, you receive a **payment** for performing the task of **identifying euro coins**. You receive **10 euro** if you made **10 (2) or fewer mistakes** in identifying the 204 coins. You receive **9.50 (2.50) euro** if you made **more than 10 (2) mistakes** in identifying the 204 coins. [T2, T3, T4, T5] of **identifying euro coins**.

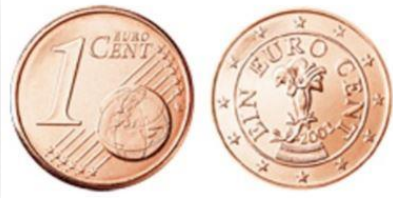

Welchen Wert hat die Münze?

bitte wählen ▾

In welchem Land wurde die Münze geprägt?

bitte wählen ▾

Weiter

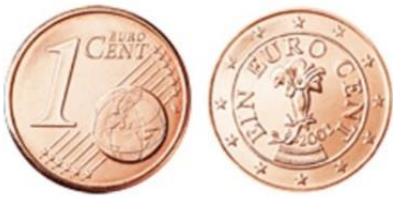

Welchen Wert hat die Münze?

bitte wählen ▾

bitte wählen

1 Cent

2 Cent

5 Cent

10 Cent

20 Cent

50 Cent

1 Euro

2 Euro

In welchem Land wurde die Münze geprägt?

bitte wählen ▾

Weiter

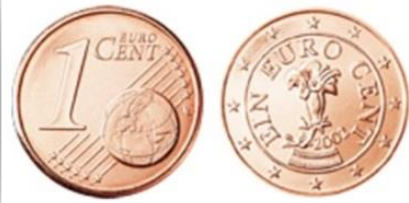

Welchen Wert hat die Münze?

bitte wählen ▾

In welchem Land wurde die Münze geprägt?

nicht im Katalog enthalten ▾

bitte wählen  
Belgien  
Deutschland  
Estland  
Finnland  
Frankreich  
Griechenland  
Irland  
Italien  
Luxemburg  
Malta  
Niederlande  
Osterreich  
Portugal  
Slowakei  
Slowenien  
Spanien

Weiter
